# Supplementary material for: Knowledge and Attitudes toward First Aid among Medical and Nursing Students at Taibah University in Madinah City, Saudi Arabia: A Cross-Sectional Study
Source: MDPI journal article supplement (doi:10.3390/healthcare11222924), 2023-11-08
Supplement: s1 [file s1]

**Supplementary Table 1: Frequency and percentage of knowledge, practices, and attitude on first aid among Students.**

| <b>Theoretical Knowledge</b>                                                                                              | <b>True<br/>N (%)</b> | <b>False<br/>N (%)</b> |
|---------------------------------------------------------------------------------------------------------------------------|-----------------------|------------------------|
| 1. What does CPR stand for?                                                                                               | 274 (76.3)            | 85 (23.7)              |
| 2. Which of the following is the correct ratio of chest compression?                                                      | 251 (69.9)            | 108 (30.1)             |
| 3. What is the proper definition of an open fracture?                                                                     | 307 (85.5)            | 52 (14.5)              |
| 4. Why should you act quickly for a casualty with severe bleeding?                                                        | 283 (78.8)            | 76 (21.2)              |
| 5. Does first aid require expensive equipment?                                                                            | 202 (56.3)            | 157 (43.7)             |
| <b>Practice statement</b>                                                                                                 | <b>True<br/>N (%)</b> | <b>False<br/>N (%)</b> |
| 1. What would be your first step if you encountered a person with profuse leg bleeding due to a gunshot wound?            | 147 (40.9)            | 212 (59.1)             |
| 2. What would you do first for a person who has burnt his hand?                                                           | 234 (65.2)            | 125 (34.8)             |
| 3. What would you encourage your colleague to do if he were to become distressed by a piece of food lodged in his airway? | 211 (58.8)            | 148 (41.2)             |
| 4. What should you do to a person who has fallen down with a suspected thigh fracture?                                    | 260 (72.4)            | 99 (27.6)              |
| <b>Attitude statement</b>                                                                                                 | <b>True<br/>N (%)</b> | <b>False<br/>N (%)</b> |
| 1. If you have good knowledge of first aid, you should not hesitate to use it when needed?                                | 250 (69.6)            | 109 (30.4)             |
| 2. Do you support including first aid in the medical college curriculum?                                                  | 334 (93.0)            | 25 (7.0)               |
| 3. Would you like to give a basic idea of first aid techniques to your fellow students?                                   | 175 (48.7)            | 184 (51.3)             |
| 4. Do you think first aid decreases the burden of hospitals?                                                              | 190 (52.9)            | 169 (47.1)             |
| 5. Do you think first aid increases patients' survival rates?                                                             | 294 (81.9)            | 65 (18.1)              |
